# Supplementary material for: Conversational agents and the making of mental health recovery
Source: PubMed Central journal article supplement — Digit Health. 2020 Nov 20;6:2055207620966170. doi: 10.1177/2055207620966170 (PMC7683843; doi:10.1177/2055207620966170), 2020-11-20
Supplement: sj-pdf-1-dhj-10.1177_2055207620966170.pdf [file sj-pdf-1-dhj-10.1177_2055207620966170.pdf]

## Appendix 1: List of sources analysed

| Source reference | Page description                                         | URL                                                                                                                                                                       |
|------------------|----------------------------------------------------------|---------------------------------------------------------------------------------------------------------------------------------------------------------------------------|
| Woebot_1         | Landing                                                  | <a href="https://woebot.io/">https://woebot.io/</a>                                                                                                                       |
| Woebot_2         | How it works (linked in several places)                  | <a href="https://woebot.io/how-it-works">https://woebot.io/how-it-works</a>                                                                                               |
| Woebot_3         | Who we are                                               | <a href="https://woebot.io/about">https://woebot.io/about</a>                                                                                                             |
| Woebot_4         | Careers Landing page                                     | <a href="https://woebot.io/careers">https://woebot.io/careers</a>                                                                                                         |
| Woebot_5         | Blog landing page                                        | <a href="https://woebot.io/blog/">https://woebot.io/blog/</a>                                                                                                             |
| Woebot_6         | Blog – How I use Woebot in my clinical practice          | <a href="https://woebot.io/blog/how-i-use-woebot-in-my-clinical-practice/">https://woebot.io/blog/how-i-use-woebot-in-my-clinical-practice/</a>                           |
| Woebot_7         | Blog – Why Does mindfulness matter                       | <a href="https://woebot.io/blog/why-does-mindfulness-matter/">https://woebot.io/blog/why-does-mindfulness-matter/</a>                                                     |
| Woebot_8         | Blog – is tracking your mood good for you?               | <a href="https://woebot.io/blog/is-tracking-your-mood-good-for-you/">https://woebot.io/blog/is-tracking-your-mood-good-for-you/</a>                                       |
| Woebot_9         | Blog – how modern therapy is like learning to play piano | <a href="https://www.woebot.io/blog/how-modern-therapy-is-like-learning-to-play-piano/">https://www.woebot.io/blog/how-modern-therapy-is-like-learning-to-play-piano/</a> |
| Woebot_10        | Blog – why we will never sell your data to advertisers   | <a href="https://www.woebot.io/blog/why-well-never-sell-your-data-to-advertisers/">https://www.woebot.io/blog/why-well-never-sell-your-data-to-advertisers/</a>           |
| Woebot_11        | Blog-pride                                               | <a href="https://www.woebot.io/blog/p-r-i-d-e/">https://www.woebot.io/blog/p-r-i-d-e/</a>                                                                                 |
| Woebot_12        | Blog – six things we’ve learned in woebot’s first year   | <a href="https://www.woebot.io/blog/6-things-weve-learned-in-woebots-1-year/">https://www.woebot.io/blog/6-things-weve-learned-in-woebots-1-year/</a>                     |
| Woebot_13        | Blog – in the office                                     | <a href="https://www.woebot.io/blog/in-the-office/">https://www.woebot.io/blog/in-the-office/</a>                                                                         |
| Woebot_14        | Blog – mental health awareness past and present          | <a href="https://www.woebot.io/blog/mental-health-awareness-past-present/">https://www.woebot.io/blog/mental-health-awareness-past-present/</a>                           |
| Woebot_15        | Blog – why we need mental health chatbots                | <a href="https://www.woebot.io/blog/why-we-need-mental-health-chatbots/">https://www.woebot.io/blog/why-we-need-mental-health-chatbots/</a>                               |
| Woebot_16        | Blog – Woebot labs and GDPR compliance                   | <a href="https://www.woebot.io/blog/woebot-labs-gdpr-compliance-plan/">https://www.woebot.io/blog/woebot-labs-gdpr-compliance-plan/</a>                                   |
| Woebot_17        | Blog - what is GDPR                                      | <a href="https://www.woebot.io/blog/what-is-gdpr/">https://www.woebot.io/blog/what-is-gdpr/</a>                                                                           |
| Woebot_18        | Core beliefs                                             | <a href="https://woebot.io/corebeliefs">https://woebot.io/corebeliefs</a>                                                                                                 |
| Woebot_19        | FAQs                                                     | <a href="https://woebot.io/faqs">https://woebot.io/faqs</a>                                                                                                               |
| Woebot_20        | Partner with us landing page                             | <a href="https://woebot.io/partners">https://woebot.io/partners</a>                                                                                                       |

|           |                                                      |                                                                                                                                                                                                                                                     |
|-----------|------------------------------------------------------|-----------------------------------------------------------------------------------------------------------------------------------------------------------------------------------------------------------------------------------------------------|
| Woebot_20 | Embedded video on 'partner with us' page             | <a href="https://www.today.com/video/meet-woebot-the-therapy-robot-who-s-ready-to-listen-1426092099917">https://www.today.com/video/meet-woebot-the-therapy-robot-who-s-ready-to-listen-1426092099917</a>                                           |
| Woebot_21 | Twitter page (link throughout official site)         | <a href="https://twitter.com/HiWoebot">https://twitter.com/HiWoebot</a>                                                                                                                                                                             |
| Woebot_22 | Facebook page (link throughout official site)        | <a href="https://www.facebook.com/HiWoebot">https://www.facebook.com/HiWoebot</a>                                                                                                                                                                   |
| Woebot_23 | Instagram page (link throughout official site)       | <a href="https://www.instagram.com/woebot/">https://www.instagram.com/woebot/</a>                                                                                                                                                                   |
| Woebot_24 | Landing page link to news item - Bloomberg           | <a href="https://www.bloomberg.com/news/articles/2017-11-15/this-chatbot-can-teach-you-therapy-exercises">https://www.bloomberg.com/news/articles/2017-11-15/this-chatbot-can-teach-you-therapy-exercises</a>                                       |
| Woebot_26 | Landing page link to news item – Wall Street Journal | <a href="https://www.wsj.com/articles/ai-powered-systems-target-mental-health-1525053840">https://www.wsj.com/articles/ai-powered-systems-target-mental-health-1525053840</a>                                                                       |
| Woebot_27 | Landing page link to news item - Wired               | <a href="https://www.wired.com/2017/06/facebook-messenger-woebot-chatbot-therapist/">https://www.wired.com/2017/06/facebook-messenger-woebot-chatbot-therapist/</a>                                                                                 |
| Woebot_28 | Landing page link to news item - Guardian            | <a href="https://www.theguardian.com/lifeandstyle/shortcuts/2019/jan/02/woebots-ai-counselling-future-therapy-mental-health">https://www.theguardian.com/lifeandstyle/shortcuts/2019/jan/02/woebots-ai-counselling-future-therapy-mental-health</a> |
| Woebot_29 | Landing page link to news item - Mashable            | <a href="https://mashable.com/2017/06/08/mental-health-chatbots/?europe=true">https://mashable.com/2017/06/08/mental-health-chatbots/?europe=true</a>                                                                                               |
| Woebot_30 | Landing page link to news item - Newsweek            | <a href="https://www.newsweek.com/artificial-intelligence-therapist-robots-machine-learning-health-care-680969">https://www.newsweek.com/artificial-intelligence-therapist-robots-machine-learning-health-care-680969</a>                           |
| Woebot_31 | Landing page link to news item – MIT Tech Review     | <a href="https://www.technologyreview.com/s/609142/andrew-ng-has-a-chatbot-that-can-help-with-depression/">https://www.technologyreview.com/s/609142/andrew-ng-has-a-chatbot-that-can-help-with-depression/</a>                                     |
| Woebot_32 | Landing page link to news item - Quartz              | <a href="https://qz.com/1553296/app-based-therapy-aims-to-help-with-depression-and-anxiety/">https://qz.com/1553296/app-based-therapy-aims-to-help-with-depression-and-anxiety/</a>                                                                 |
| Woebot_33 | Landing page link to news item – Business Insider    | <a href="https://www.businessinsider.com/therapy-chatbot-depression-app-what-its-like-woebot-2018-1?r=US&amp;IR=T">https://www.businessinsider.com/therapy-chatbot-depression-app-what-its-like-woebot-2018-1?r=US&amp;IR=T</a>                     |
| Woebot_34 | Landing page link to news item – New York Times      | <a href="https://www.nytimes.com/interactive/2018/11/14/magazine/tech-design-ai-chatbot.html">https://www.nytimes.com/interactive/2018/11/14/magazine/tech-design-ai-chatbot.html</a>                                                               |
| Wysa_1    | Landing page                                         | <a href="https://www.wysa.io/">https://www.wysa.io/</a>                                                                                                                                                                                             |
| Wysa_2    | Outcomes                                             | <a href="https://www.wysa.io/outcomes">https://www.wysa.io/outcomes</a>                                                                                                                                                                             |
| Wysa_3    | Linked paper on 'outcomes' page                      | <a href="https://journals.sagepub.com/doi/10.1177/1178222619829083">https://journals.sagepub.com/doi/10.1177/1178222619829083</a>                                                                                                                   |

|         |                                               |                                                                                                                                                                                                                                                                                                                                                                                                                                                                                                                                                                                         |
|---------|-----------------------------------------------|-----------------------------------------------------------------------------------------------------------------------------------------------------------------------------------------------------------------------------------------------------------------------------------------------------------------------------------------------------------------------------------------------------------------------------------------------------------------------------------------------------------------------------------------------------------------------------------------|
| Wysa_4  | Linked clinical standards on 'outcomes' paged | <a href="https://digital.nhs.uk/data-and-information/information-standards/information-standards-and-data-collections-including-extractions/publications-and-notifications/standards-and-collections/dcb0129-clinical-risk-management-its-application-in-the-manufacture-of-health-it-systems">https://digital.nhs.uk/data-and-information/information-standards/information-standards-and-data-collections-including-extractions/publications-and-notifications/standards-and-collections/dcb0129-clinical-risk-management-its-application-in-the-manufacture-of-health-it-systems</a> |
| Wysa_5  | Linked 'wysa/NHS case study' on outcomes page | <a href="http://www.wysa.io/nhs-case-study">http://www.wysa.io/nhs-case-study</a>                                                                                                                                                                                                                                                                                                                                                                                                                                                                                                       |
| Wysa_6  | Linked peer reviewed study on 'outcomes' page | <a href="https://mhealth.jmir.org/2018/11/e12106/">https://mhealth.jmir.org/2018/11/e12106/</a>                                                                                                                                                                                                                                                                                                                                                                                                                                                                                         |
| Wysa_7  | Media landing page                            | <a href="https://www.wysa.io/media">https://www.wysa.io/media</a>                                                                                                                                                                                                                                                                                                                                                                                                                                                                                                                       |
| Wysa_8  | Press Kit                                     | Opens from link on above url                                                                                                                                                                                                                                                                                                                                                                                                                                                                                                                                                            |
| Wysa_9  | Blog                                          | <a href="https://www.wysa.io/blog/5-superfoods-to-boost-mental-wellness">https://www.wysa.io/blog/5-superfoods-to-boost-mental-wellness</a>                                                                                                                                                                                                                                                                                                                                                                                                                                             |
| Wysa_10 | Blog                                          | <a href="https://www.wysa.io/blog/how-to-focus-on-yourself">https://www.wysa.io/blog/how-to-focus-on-yourself</a>                                                                                                                                                                                                                                                                                                                                                                                                                                                                       |
| Wysa_11 | Blog                                          | <a href="https://www.wysa.io/blog/set-a-smart-resolution-this-new-year">https://www.wysa.io/blog/set-a-smart-resolution-this-new-year</a>                                                                                                                                                                                                                                                                                                                                                                                                                                               |
| Wysa_12 | Blog                                          | <a href="https://www.wysa.io/blog/you-are-not-alone">https://www.wysa.io/blog/you-are-not-alone</a>                                                                                                                                                                                                                                                                                                                                                                                                                                                                                     |
| Wysa_13 | Blog                                          | <a href="https://www.wysa.io/blog/dealing-with-your-christmas-stressors">https://www.wysa.io/blog/dealing-with-your-christmas-stressors</a>                                                                                                                                                                                                                                                                                                                                                                                                                                             |
| Wysa_14 | Blog                                          | <a href="https://www.wysa.io/blog/is-the-winter-gloom-getting-you">https://www.wysa.io/blog/is-the-winter-gloom-getting-you</a>                                                                                                                                                                                                                                                                                                                                                                                                                                                         |
| Wysa_15 | Blog                                          | <a href="https://www.wysa.io/blog/why-can-t-i-sleep">https://www.wysa.io/blog/why-can-t-i-sleep</a>                                                                                                                                                                                                                                                                                                                                                                                                                                                                                     |
| Wysa_16 | Blog                                          | <a href="https://www.wysa.io/blog/subtle-ways-of-body-shaming">https://www.wysa.io/blog/subtle-ways-of-body-shaming</a>                                                                                                                                                                                                                                                                                                                                                                                                                                                                 |
| Wysa_17 | Blog                                          | <a href="https://www.wysa.io/blog/4-ways-to-avoid-peer-pressure">https://www.wysa.io/blog/4-ways-to-avoid-peer-pressure</a>                                                                                                                                                                                                                                                                                                                                                                                                                                                             |
| Wysa_18 | Blog                                          | <a href="https://www.wysa.io/blog/6-steps-to-overcome-exam-anxiety">https://www.wysa.io/blog/6-steps-to-overcome-exam-anxiety</a>                                                                                                                                                                                                                                                                                                                                                                                                                                                       |
| Wysa_19 | Blog                                          | <a href="https://www.wysa.io/blog/dear-mum-and-dad">https://www.wysa.io/blog/dear-mum-and-dad</a>                                                                                                                                                                                                                                                                                                                                                                                                                                                                                       |
| Wysa_20 | Blog                                          | <a href="https://www.wysa.io/blog/why-do-men-suffer-depression-in-silence">https://www.wysa.io/blog/why-do-men-suffer-depression-in-silence</a>                                                                                                                                                                                                                                                                                                                                                                                                                                         |
| Wysa_21 | Blog                                          | <a href="https://www.wysa.io/blog/6-simple-techniques-to-communicate-better-with-your-parents">https://www.wysa.io/blog/6-simple-techniques-to-communicate-better-with-your-parents</a>                                                                                                                                                                                                                                                                                                                                                                                                 |
| Wysa_22 | Blog                                          | <a href="https://www.wysa.io/blog/when-netflix-is-more-fun-than-friends">https://www.wysa.io/blog/when-netflix-is-more-fun-than-friends</a>                                                                                                                                                                                                                                                                                                                                                                                                                                             |
| Wysa_23 | Blog                                          | <a href="https://www.wysa.io/blog/a-healthy-bedtime-routine-for-tech-addicts">https://www.wysa.io/blog/a-healthy-bedtime-routine-for-tech-addicts</a>                                                                                                                                                                                                                                                                                                                                                                                                                                   |
| Wysa_24 | Blog                                          | <a href="https://www.wysa.io/blog/you-don-t-need-to-delete-your-instagram-or-facebook">https://www.wysa.io/blog/you-don-t-need-to-delete-your-instagram-or-facebook</a>                                                                                                                                                                                                                                                                                                                                                                                                                 |
| Wysa_25 | Blog                                          | <a href="https://www.wysa.io/blog/why-we-crave-carbs-and-sugar-it-s-all-in-your-mind-meet-serotonin">https://www.wysa.io/blog/why-we-crave-carbs-and-sugar-it-s-all-in-your-mind-meet-serotonin</a>                                                                                                                                                                                                                                                                                                                                                                                     |

|         |                                           |                                                                                                                                                                                     |
|---------|-------------------------------------------|-------------------------------------------------------------------------------------------------------------------------------------------------------------------------------------|
| Wysa_26 | Blog                                      | <a href="https://www.wysa.io/blog/what-is-mindful-eating-friday-nights-explained-by-experts">https://www.wysa.io/blog/what-is-mindful-eating-friday-nights-explained-by-experts</a> |
| Wysa_27 | Blog                                      | <a href="https://www.wysa.io/blog/5-superfoods-to-boost-mental-wellness">https://www.wysa.io/blog/5-superfoods-to-boost-mental-wellness</a>                                         |
| Wysa_28 | Blog                                      | <a href="https://www.wysa.io/blog/playbook-rule-no-1-play-it-cool-and-don-t-seem-too-eager">https://www.wysa.io/blog/playbook-rule-no-1-play-it-cool-and-don-t-seem-too-eager</a>   |
| Wysa_29 | Blog                                      | <a href="https://www.wysa.io/blog/how-i-learned-to-ask-for-help-and-why-you-should-too">https://www.wysa.io/blog/how-i-learned-to-ask-for-help-and-why-you-should-too</a>           |
| Wysa_30 | Blog                                      | <a href="https://www.wysa.io/blog/nhs-children-services">https://www.wysa.io/blog/nhs-children-services</a>                                                                         |
| Wysa_31 | Twitter linked throughout                 | <a href="https://twitter.com/wysabuddy">https://twitter.com/wysabuddy</a>                                                                                                           |
| Wysa_32 | instagram                                 | <a href="https://www.instagram.com/wysa_buddy/">https://www.instagram.com/wysa_buddy/</a>                                                                                           |
| Wysa_33 | Youtube channel                           | <a href="https://www.youtube.com/channel/UCG9_lcAM6-S0ny-GpCQgbyg/featured">https://www.youtube.com/channel/UCG9_lcAM6-S0ny-GpCQgbyg/featured</a>                                   |
| Tess_1  | Landing page                              | <a href="https://www.x2ai.com/">https://www.x2ai.com/</a>                                                                                                                           |
| Tess_2  | Outcomes landing page                     | <a href="https://www.x2ai.com/outcomes">https://www.x2ai.com/outcomes</a>                                                                                                           |
| Tess_3  | Outcomes – published research, read paper | <a href="https://mental.jmir.org/2018/4/e64/">https://mental.jmir.org/2018/4/e64/</a>                                                                                               |
| Tess_4  | Outcomes – published research, read paper | <a href="https://www.longwoods.com/content/25384">https://www.longwoods.com/content/25384</a>                                                                                       |
| Tess_5  | Outcomes – published research, read paper | <a href="https://academic.oup.com/tbm/article-abstract/9/3/440/5489496">https://academic.oup.com/tbm/article-abstract/9/3/440/5489496</a>                                           |
| Tess_6  | Outcomes – published research, read paper | <a href="https://www.ncbi.nlm.nih.gov/pubmed/30956924">https://www.ncbi.nlm.nih.gov/pubmed/30956924</a>                                                                             |
| Tess_7  | Outcomes – published research, read paper | <a href="https://www.x2ai.com/eapa">https://www.x2ai.com/eapa</a>                                                                                                                   |
| Tess_8  | Outcomes – published research, read paper | <a href="https://www.researchprotocols.org/2019/4/e11800/">https://www.researchprotocols.org/2019/4/e11800/</a>                                                                     |
| Tess_9  | Vimeo video - Werk                        | <a href="https://www.x2ai.com/outcomes">https://www.x2ai.com/outcomes</a>                                                                                                           |
| Tess_10 | Business – landing page                   | <a href="https://www.x2ai.com/business">https://www.x2ai.com/business</a>                                                                                                           |
| Tess_11 | Business – link to case study             | <a href="https://www.x2ai.com/case-studies/county-of-monterey">https://www.x2ai.com/case-studies/county-of-monterey</a>                                                             |
| Tess_12 | Business-link to case study               | <a href="https://www.x2ai.com/case-studies/northwestern-university">https://www.x2ai.com/case-studies/northwestern-university</a>                                                   |
| Tess_13 | For individuals – landing page            | <a href="https://www.x2ai.com/individuals">https://www.x2ai.com/individuals</a>                                                                                                     |
| Tess_14 | Vimeo video with user                     | <a href="https://www.x2ai.com/individuals">https://www.x2ai.com/individuals</a>                                                                                                     |
| Tess_15 | Twitter linked                            | <a href="https://twitter.com/x2_ai">https://twitter.com/x2_ai</a>                                                                                                                   |

|         |                  |                                                                                                                        |
|---------|------------------|------------------------------------------------------------------------------------------------------------------------|
| Tess_16 | Facebook Linked  | <a href="https://www.facebook.com/X2AI.emotion/">https://www.facebook.com/X2AI.emotion/</a>                            |
| Tess_17 | Instagram linked | Symbol links to linkedin = <a href="https://www.linkedin.com/company/x2ai/">https://www.linkedin.com/company/x2ai/</a> |
